# Supplementary material
Source: PubMed Central journal article supplement (PMC2634900)
Supplement: 0810958105_0810958105SI.pdf [file 0810958105_0810958105SI.pdf]

# Supporting Information

Marzec *et al.* 10.1073/pnas.0810958105

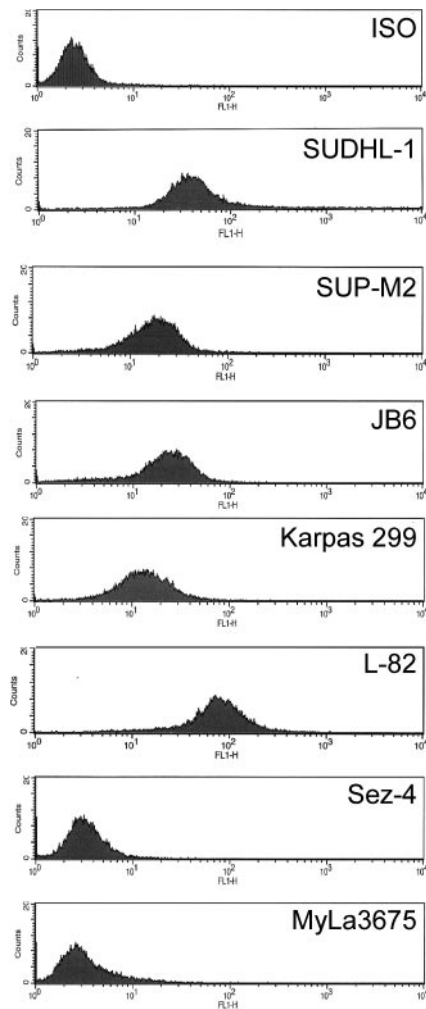

**Fig. S1.** Expression of the CD274 protein by the depicted ALK+TCL and two CTCL cell lines, examined by flow cytometry (the five upper and two lowest panels, respectively). Staining with a CD274 nonreactive, isotypematched antibody (ISO) served as a negative control.

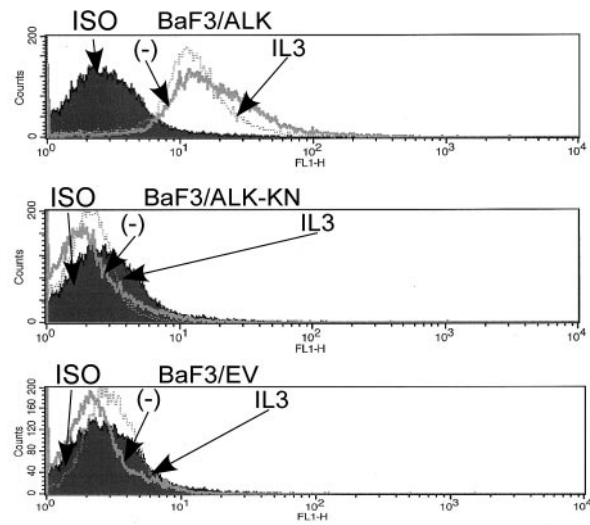

**Fig. S2.** Expression of CD274 examined by flow cytometry in the IL-3-dependent BaF3 cells transfected with the intact, enzymatically active NPM/ALK, kinase-activity-negative K210R NPM/ALK mutant (ALK-KN), or empty vector, after culture for 24 h in medium with IL-3 or without IL-3 (-). Cells labeled with an isotypematched (ISO) antibody served as negative controls.

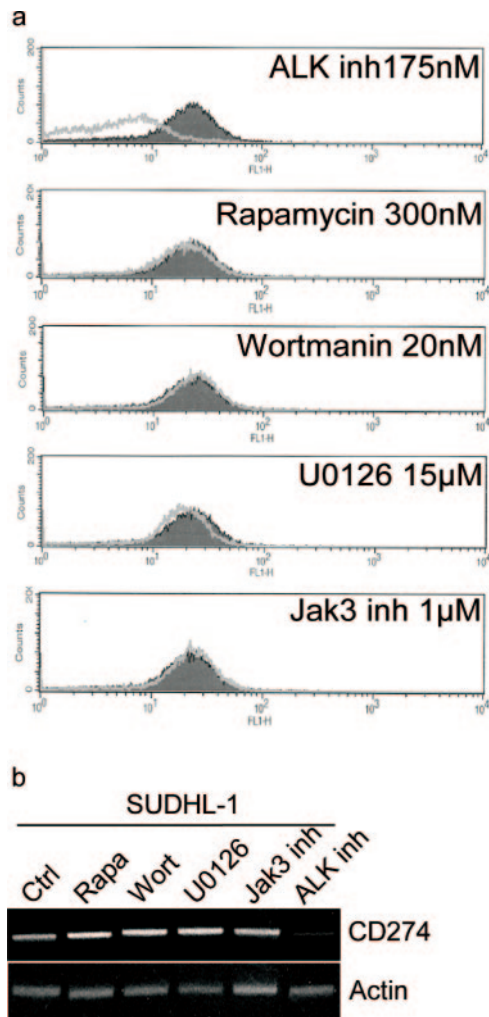

**Fig. S3.** Lack of effect of mTORC1, PI3K, ERK1/2, and Jak3 inhibition on CD274 expression by the ALK+TCL cells. ALK+TCL SUDHL-1 cells were treated with rapamycin, wortmaninn, U0126, Jak3 inhibitor or, as a control, CEP-14083 ALK inhibitor at the depicted, pretested, highly effective concentrations (15, 16, 18, 20) and evaluated for CD274 protein expression by flow cytometry (a) and CD274 mRNA by RT-PCR (b).
